# Supplementary material for: Reverse fabrication method of thin-film composite membranes for hydrogen separation
Source: Royal Society of Chemistry journal article supplement (doi:10.1039/d3cc06099c), 2024-01-01
Supplement: d3cc06099c1.pdf [file d3cc06099c1.pdf]

## Electronic Supplementary Information

### Reverse Fabrication Method of Thin-Film Composite Membranes for Hydrogen Separation

Young Jae Son,<sup>a</sup> Na Yeong Oh,<sup>a</sup> Su Bin Min,<sup>b</sup> Jeong-Hoon Kim,<sup>b,\*</sup> Jong Hak Kim<sup>a,\*</sup>

<sup>a</sup> *Department of Chemical and Biomolecular Engineering, Yonsei University, 50 Yonsei-ro,  
Seodaemun-gu, Seoul 03722, South Korea*

<sup>b</sup> *CI gas & Carbon Convergent Research Center, Chemical & Process Technology Division,  
Korea Research Institute of Chemical Technology, Gajeong-ro 141, Yuseong-gu, Daejeon  
34114, South Korea*

\* To whom correspondence should be addressed

E-mail: jhoonkim@kriect.re.kr (J.-H. Kim) or jonghak@yonsei.ac.kr (J. H. Kim)

## **Experimental**

### **Materials**

Matrimid®5218 was purchased from Huntsman Corporation. Polysulfone (Mw = 22,000 Da) was purchased from Sigma-Aldrich. DI-water and N-Methyl-2-pyrrolidone (NMP; 99.5% purity) were purchased from Samchun Chemicals (South Korea). THF (99.9%) and n-hexane (95.0%) were purchased from Duksan Pure Chemicals Co., Ltd. (South Korea). PDMS (Sylgard 184) was purchased from Dow Corning. All materials were used without further purification.

### **Membrane preparation**

The TFC membranes were prepared via the reverse method using the following steps with a few variations. First, MI was dissolved in THF at a ratio of 2 wt%/vol% and spin-coated onto a glass substrate at 2000 rpm. The MI-coated glass substrate was dried in a 50 °C oven for 3 h, and then the PSF/NMP solution was cast onto the substrate by doctor-blading with a 300 µm gap between the blade and the substrate, followed by immersion in water for the NIPS process. The time between doctor-blading and the NIPS process was varied to examine its effect on the MI layer. The immersed membrane was pulled out after 20 min and dried at 25 °C for 24 h. Then, the membrane was taped to a glass substrate with a selective layer on the top side to spin-coat the PDMS layer. PDMS/n-hexane solutions of varying concentrations were spin-coated as caulking layers. The membrane was put into an 80 °C oven for 24 h to cure the PDMS layer. The prepared membranes were named PDMS/MI/PSF\_X, where X refers to the delay (in seconds) between casting and immersion in water during membrane preparation.

### **Gas permeation measurements**

The gas permeances of pure H<sub>2</sub>, CH<sub>4</sub>, and N<sub>2</sub> were measured at 30 °C using a constant-pressure/variable-volume apparatus (Airrane Co., Ltd., Korea) equipped with a flat-sheet permeation cell with an effective area of approximately 10.2 cm<sup>2</sup>. The feed pressure was varied from 3 bar to 12 bar. The gas permeance was expressed using a gas permeation unit (GPU) [1 GPU = 1 × 10<sup>-6</sup> cm<sup>3</sup>(STP)/(s·cm<sup>2</sup>·cmHg)]. The selectivity of the membranes was defined as the ratio of the permeance for each gas.

### **Characterization**

FT-IR spectroscopy was conducted using an FT-IR spectrometer (Spectrum Two, PerkinElmer, USA) to characterize the interactions between layers. XRD patterns were analyzed with D8 Advance (Bruker, Germany) at a scanning speed of 1° min<sup>-1</sup> in the 2θ range of 5° to 40°. The atomic percentages of the individual layers of the TFC membranes were determined using XPS (K-Alpha, Thermo Fisher Scientific, USA) at a penetration depth of 10 nm. Imaging of the surface and cross sections was performed using FE-SEM (JSM-7610F-Plus, JEOL, Japan) to examine the structure and thickness of the membranes. All the samples were sputter-coated with platinum for 100 s to enhance their conductivity. The samples used for the cross-sectional images were prepared by immersing them in liquid N<sub>2</sub> and breaking them in half. The mechanical properties of the prepared membranes were tested using a UTM (MultiTest2.5-i, Mecmesin) at a crosshead speed of 20 mm/min to observe the changes in mechanical strength at different delay times. The contact angles of the membrane surfaces were analyzed using a contact angle analyzer (Theta Lite, Biolin Scientific, Sweden) to ensure the successful coating of each layer.

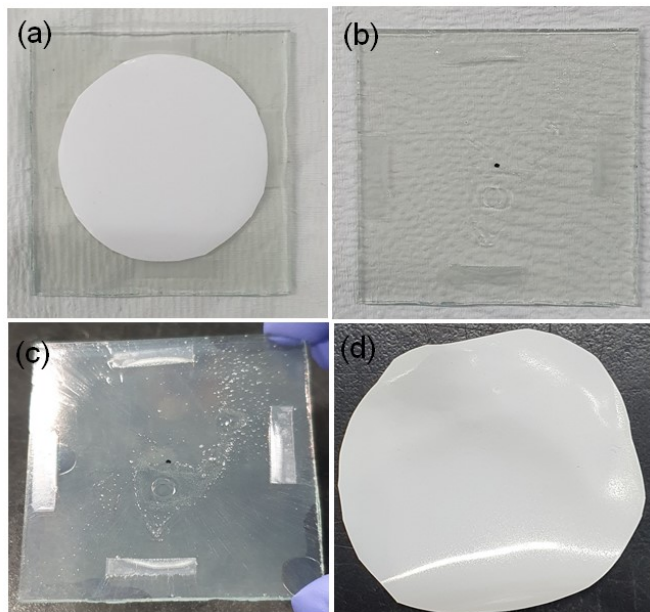

**Figure S1.** Photos of (a) porous PSF membrane prepared by NIPS, (b, c) MI/PSF membrane prepared by conventional method, and (d) MI/PSF membrane prepared by reverse method.

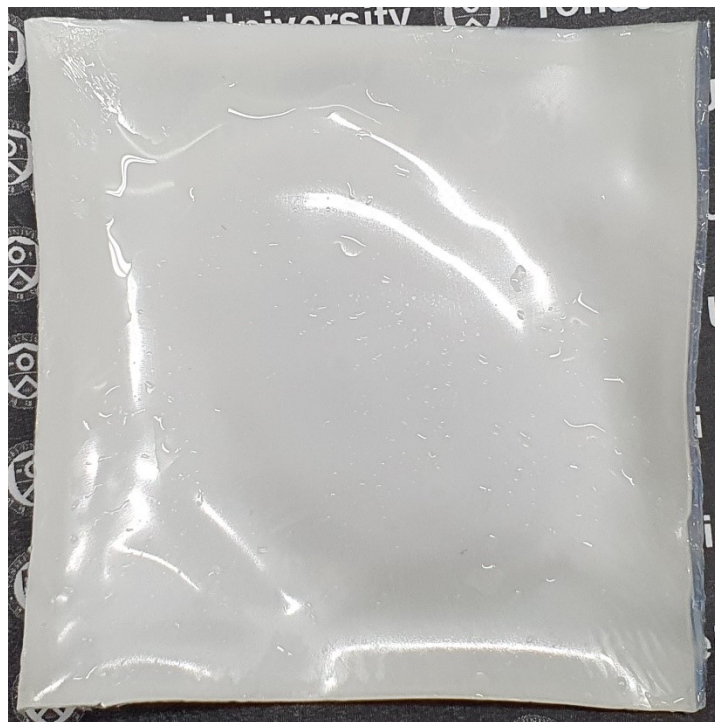

**Figure S2.** Photo of large area ( $10 \times 10 \text{ cm}^2$ ) MI/PSF membrane prepared by reverse method.

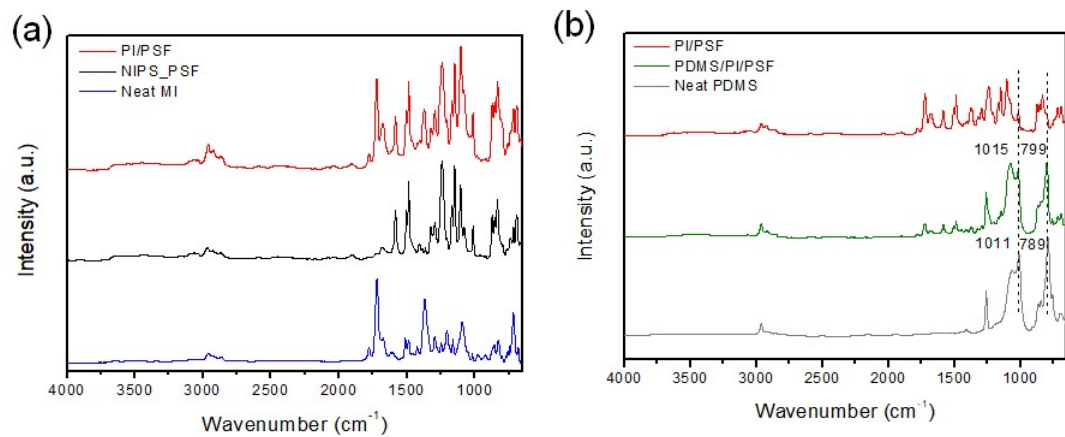

**Figure S3.** FT-IR spectra of (a) neat MI, PSF membrane deposited by NIPS, PI/PSF membrane deposited by reverse method, and (b) neat PDMS, PI/PSF membrane deposited by reverse method, and PDMS-coated PI/PSF membrane

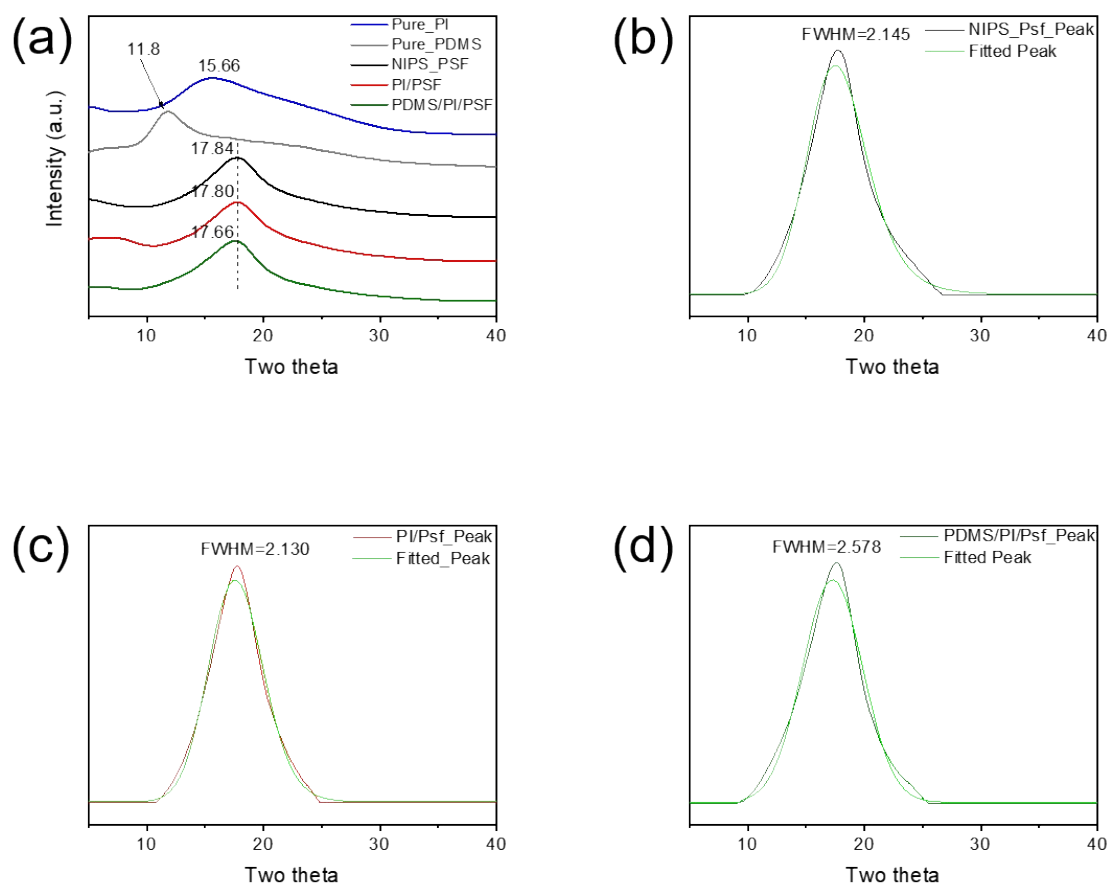

**Figure S4.** (a) XRD patterns of raw materials and membranes fabricated by reverse method and (b, c, d) FWHM verified with fitted peaks

**Table S1.** XPS elemental analysis of membranes prepared via the reverse method

|             | C     | O     | N    | Si    | S    |
|-------------|-------|-------|------|-------|------|
| NIPS_PSF    | 84.26 | 12.83 | -    | -     | 2.92 |
| MI/PSF      | 84.46 | 12.09 | 3.45 | -     | -    |
| PDMS/MI/PSF | 45.77 | 27.62 | -    | 26.61 | -    |



**(a)**

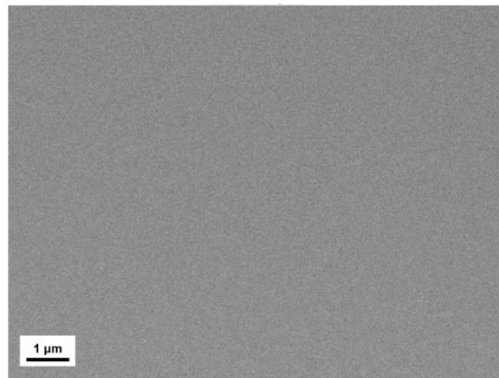

Si K series

O K series

S K series

N K series

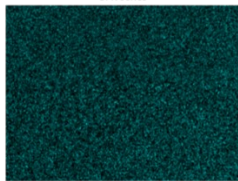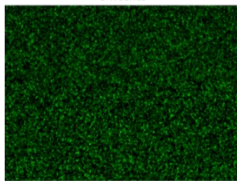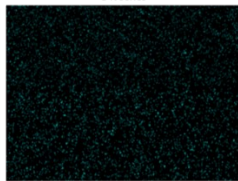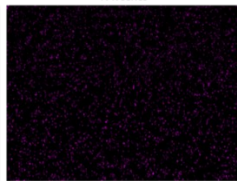

**(b)**

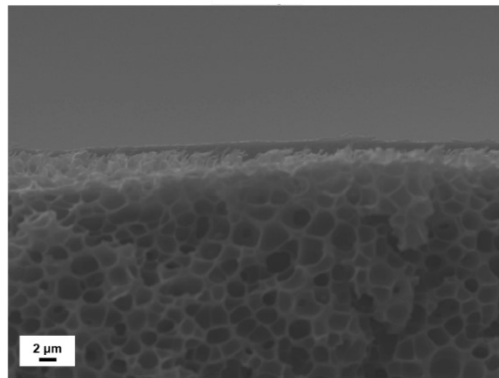

C K series

N K series

O K series

S K series

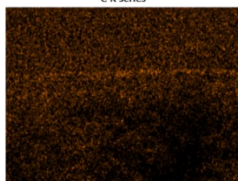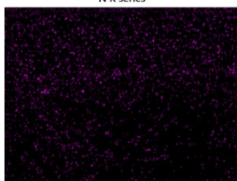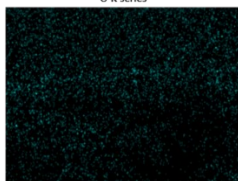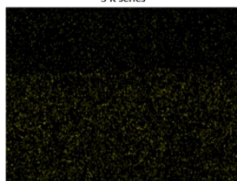

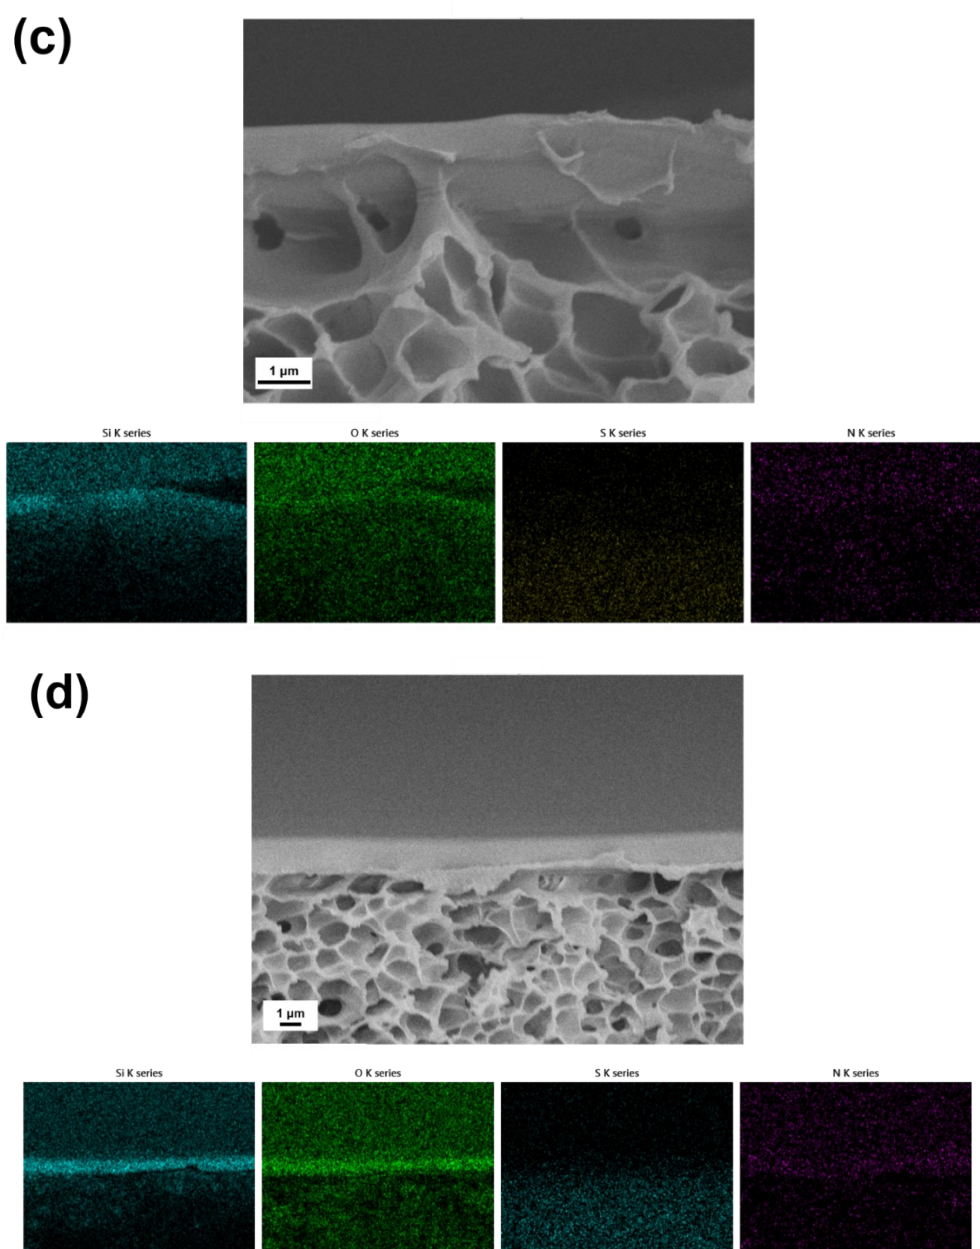

**Figure S5.** SEM-EDS images of (a) surface images of 5% PDMS/MI/PSF and cross-sectional images of (b) MI/PSF, (c) 5% PDMS/MI/PSF, (d) 10% PDMS/MI/PSF membranes prepared by reverse method

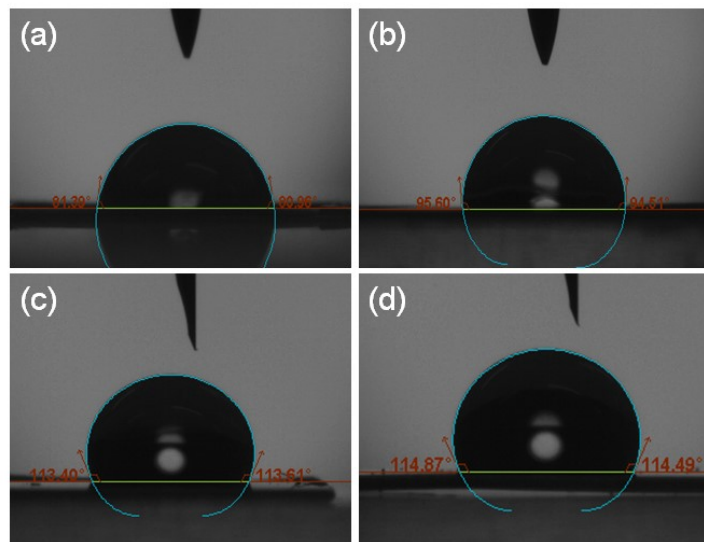

**Figure S6.** Contact angle of DI water on the membranes with different coatings: (a) NIPS\_PSF, (b) MI/PSF, and PDMS/MI/PSF membranes coated with (c) 5% PDMS and (d) 10% PDMS solution

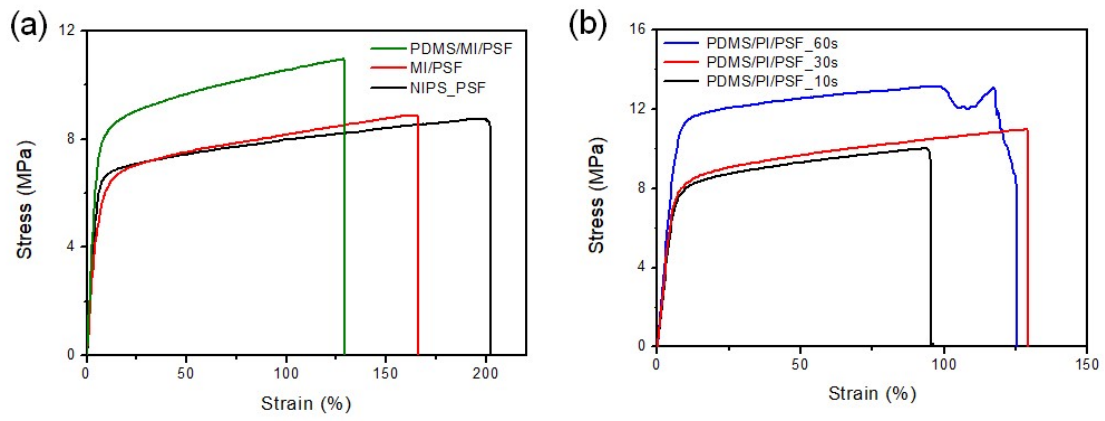

**Figure S7.** UTM results of (a) membranes with different layers and (b) PDMS/MI/PSF membranes prepared by reverse method with different delay times

**Table S2.** Gas separation performances of various TFC membranes based on all-polymeric selective layer

| Selective Materials   | Support Material                         | P <sub>feed</sub> (bar) | T(°C) | P <sub>H<sub>2</sub></sub> (GPU) | Selectivity (H <sub>2</sub> /CH <sub>4</sub> ) | Ref       |
|-----------------------|------------------------------------------|-------------------------|-------|----------------------------------|------------------------------------------------|-----------|
| PDMS/PEI              | PEI                                      | 1                       | 25    | 4.3                              | 96                                             | [1]       |
| P(DVB-co-ZnTPC)-80    | PTMSP                                    | 5.07                    | 25    | 45.0                             | 550                                            | [2]       |
| P(DVB-co-ZnTPC)-40    | PTMSP                                    | 5.07                    | 25    | 68.3                             | 210                                            | [2]       |
| P(ZnTPC)-20           | PTMSP                                    | 5.07                    | 25    | 272                              | 133                                            | [2]       |
| P(ZnTPC)-40           | PTMSP                                    | 5.07                    | 25    | 139                              | 143                                            | [2]       |
| P(ZnTPC)-80           | PTMSP                                    | 5.07                    | 25    | 76.9                             | 402                                            | [2]       |
| PBDI                  | $\alpha$ -Al <sub>2</sub> O <sub>3</sub> | 1                       | 100   | 71.7                             | 47.5                                           | [3]       |
| Poly(PFMMD)           | PAN                                      | 3.45                    | 22    | 1140                             | 57                                             | [4]       |
| Poly(PFMMD-co-PFMD) 1 | PAN                                      | 3.45                    | 22    | 1490                             | 80                                             | [4]       |
| Poly(PFMMD-co-PFMD) 2 | PAN                                      | 3.45                    | 22    | 1100                             | 157                                            | [4]       |
| Poly(PFMMD-co-PFMD) 3 | PAN                                      | 3.45                    | 22    | 1200                             | 162                                            | [4]       |
| Poly(PFMMD-co-CTFE) 1 | PAN                                      | 3.45                    | 22    | 633                              | 144                                            | [4]       |
| Poly(PFMMD-co-CTFE) 2 | PAN                                      | 3.45                    | 22    | 457                              | 194                                            | [4]       |
| Poly(PFMMD-co-CTFE) 3 | PAN                                      | 3.45                    | 22    | 254                              | 284                                            | [4]       |
| Matrimid              | PAN/PPS                                  | 1.3                     | 20    | 41.48                            | 44.23                                          | [5]       |
| PDMS/Matrimid         | PAN/PPS                                  | 1.3                     | 20    | 40.37                            | 58.82                                          | [5]       |
| X-linked Matrimid     | PAN/PPS                                  | 1.3                     | 20    | 47.03                            | 47.96                                          | [5]       |
| Matrimid              | PBI/PPS                                  | 1                       | 30    | 16.93                            | 76.17                                          | [6]       |
| Matrimid/PBI          | Hollow Fiber                             | 3.5/10                  | 35    | 43.2                             | 29.6                                           | [7]       |
| PDMS/Matrimid/PBI     | Hollow Fiber                             | 3.5/10                  | 35    | 31.6                             | 141.5                                          | [7]       |
| PDMS/MI_10            | PSF                                      | 3, 12                   | 30    | 27.9                             | 69.3                                           | This work |
| PDMS/MI_30            | PSF                                      | 3, 12                   | 30    | 41.4                             | 55.0                                           | This work |

1. A. Kargari, A. Arabi Shamsabadi and M. Bahrami Babaheidari, *Int. J. Hydrogen Energy*, 2014, 39, 6588-6597.
2. N. D. Boscher, M. Wang, A. Perrotta, K. Heinze, M. Creatore and K. K. Gleason, *Adv. Mater.*, 2016, 28, 7479-7485.

3. M. Shan, X. Liu, X. Wang, Z. Liu, H. Iziyi, S. Ganapathy, J. Gascon and F. Kapteijn, *J. Mater. Chem. A*, 2019, 7, 8929-8937.
4. M. Fang, Z. He, T. C. Merkel and Y. Okamoto, *J. Mater. Chem. A*, 2018, 6, 652-658.
5. J. Peter and K. V. Peinemann, *J. Membr. Sci.*, 2009, 340, 62-72.
6. F. Weigelt, S. Escorihuela, A. Descalzo, A. Tena, S. Escolástico, S. Shishatskiy, J. M. Serra and T. Brinkmann, *Membranes*, 2019, 9, 51.
7. S. S. Hosseini, N. Peng and T. S. Chung, *J. Membr. Sci.*, 2010, 349, 156-166.
